# Supplementary figures and images for: Technical note: GUARD – An automated fluid sampler preventing sample alteration by contamination, evaporation and gas exchange, suitable for remote areas and harsh conditions
Source: Copernicus journal article supplement (doi:10.5194/hess-2017-697), 2018-01-09

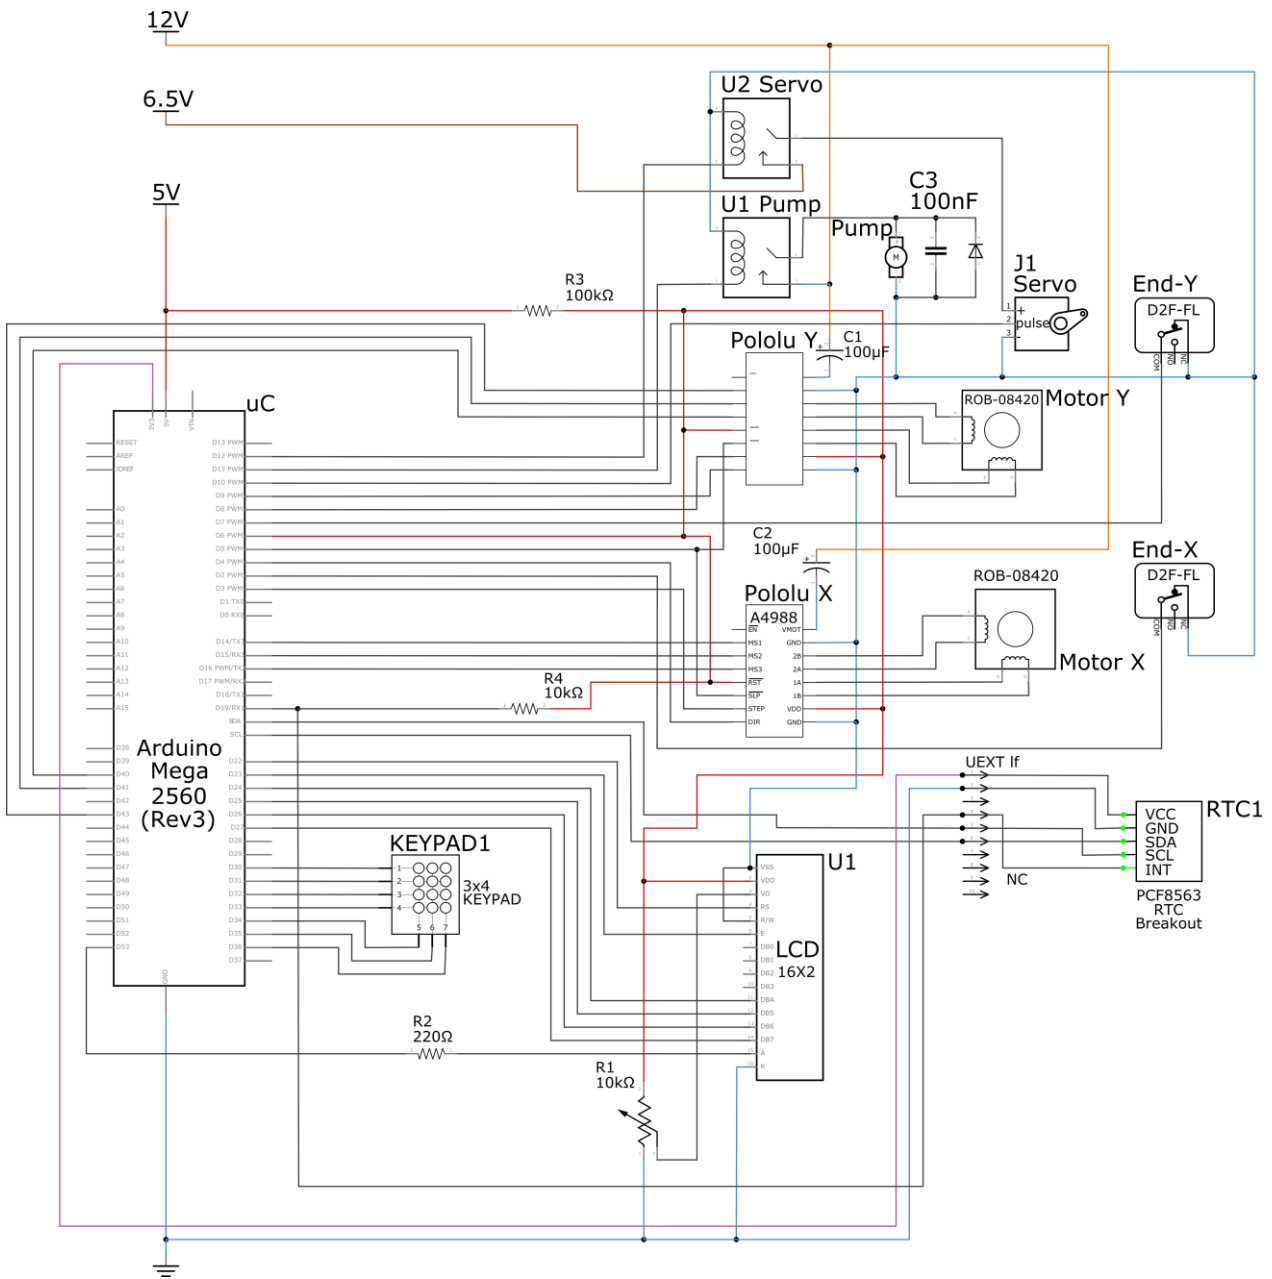

**S1: Electrical circuit diagram of the GUARD autosampler.**

Supplement: Supplementary file 1 [file hess-2017-697-supplement.pdf]
